# Supplementary material for: Protective effects of taurocholic acid on excessive hepatic lipid accumulationviaregulation of bile acid metabolism in grouper
Source: Royal Society of Chemistry journal article supplement (doi:10.1039/d1fo04085e), 2022-01-01
Supplement: d1fo04085e4.pdf [file d1fo04085e4.pdf]

## 1 **Supplementary methods:**

### 2 **2.1 Animals and diet preparation**

3 The hybrid grouper (*Epinephelus fuscoguttatus*♀ × *E. lanceolatus*♂) juveniles (before  
4 sex differentiation) were purchased from a local fish farm (Zhanjiang, China) and  
5 acclimated for 7 days by feeding with a commercial diet (50% crude protein, 10% crude  
6 lipid). Feeding was performed every day at 8:00 and 17:00 until the apparent satiation  
7 (about 3.0–5.0% of the fish body weight). All feed ingredients were crushed into  
8 powder through a 380 mm mesh and combined. Fish oil, soy lecithin, and water were  
9 then added and mixed thoroughly. After pelletization and air drying for 2–3 days at  
10 room temperature, all prepared feed was kept in a refrigerator (-20°C) until use.

### 11 **2.2 Animals experiment and sample collection**

#### 12 **2.2.1 Feeding experiment (8 weeks)**

13 The CD (control diet, 8.27% lipid) and HD diet (15.32%, added soybean oil to the CD  
14 diet) were formulated according to the previous findings that 7–13% is an optimal  
15 dietary lipid level for grouper <sup>1</sup>. Five BAs diets (BD) were prepared by adding  
16 taurocholic acid sodium (TCA, CAS: 345909-26-4, T4009, Sigma Aldrich) levels at  
17 300 (B300D), 600 (B600D), 900 (B900D), 1200 (B1200D), and 1500 (B1500D) mg  
18 kg<sup>-1</sup> to the HD diet. These tanks were randomly assigned to seven groups (CD, HD,  
19 B300D, B600D, B900D, B1200D, and B1500D), ensuring four replicates per group (7  
20 × 4 = 28).

21 Blood was obtained from the caudal vein using sterile syringes and then centrifuged  
22 (3000×g) at 4°C for 10 min to obtain the serum, which was quickly frozen in liquid  
23 nitrogen and stored at -80°C. The serum samples were used for biochemical indicators.  
24 Each liver was divided into four parts: one was placed in 4% paraformaldehyde solution  
25 for histological examination, and the remainder was quickly frozen in liquid nitrogen  
26 and stored at -80°C. The latter three liver samples were used for testing biochemical  
27 indicators, determining gene and protein expression. Each distal intestine sample (from  
28 the anus to the first twist of the intestine) was divided into two parts and then quickly  
29 frozen in liquid nitrogen and stored at -80°C. These samples were used for testing  
30 biochemical indicators and determining gene expression. The distal intestinal contents

31 were carefully collected, frozen in liquid nitrogen, and stored at -80°C till the bacterial  
32 composition and BAs analysis.

### 33 **2.2.2 Antibiotics experiment (6 days)**

34 Three common antibiotics were purchased from the Aladdin Company (China):  
35 vancomycin (CAS: 1404-93-9, V105495), neomycin sulfate (CAS: 1405-10-3,  
36 N109017), and metronidazole (CAS: 443-48-1, M109874) <sup>2,3</sup>. An ASB900D diet was  
37 formulated from the B900D diet by supplementing with a mixture of antibiotics  
38 (metronidazole 4 g kg<sup>-1</sup>, neomycin sulfate 4 g kg<sup>-1</sup>, and vancomycin 2 g kg<sup>-1</sup>). These  
39 antibiotics concentrations were selected based on a marked decrease in the total  
40 bacterial quantity in the intestinal content of zebrafish <sup>3</sup>. The short-term (6 days)  
41 antibiotics treatment was selected according to our pilot trials and other studies <sup>4</sup>.  
42 Ninety fish (body weight 21.31 ± 0.12 g) were randomly distributed into 6 plastic tanks  
43 (15 fish per tank, 500L). These tanks were randomly assigned to two groups: a short-  
44 term B900D diet group (SB900D) and an ASB900D diet group, ensuring three  
45 replicates per group (2 × 3 = 6). After 6 days of the feeding trial, six specimens from  
46 each tank were selected randomly to obtain the blood (2 fish), liver (2 fish) and distal  
47 intestine (2 fish).

### 48 **2.2.3 Injection experiment (6 days)**

49 Two kinds of BAs, two inhibitors, and two activators, were used: TCA,  
50 taurodeoxycholic acid (TDCA, CAS: 207737-97-1, S168485, Aladdin), obeticholic  
51 acid (FXR agonist, CAS: 459789-99-2, HY-12222, MCE) <sup>5</sup>, guggulsterone (FXR  
52 antagonist, CAS: 95975-55-6, HY-107738, MCE) <sup>6</sup>, SBI-115 (TGR5 antagonist, CAS:  
53 882366-16-7, HY-111534, MCE), and INT-777 (TGR5 agonist, CAS: 1199796-29-6,  
54 HY-15677, MCE) <sup>5</sup>. Six injection groups were designed as follows: 1) I-TCA group:  
55 50 mg of TCA per kg of fish body weight (injection three times: days 1, 3, and 5); 2) I-  
56 TDCA group: 50 mg kg<sup>-1</sup> of TDCA (injection on days 1, 3, and 5); 3) I-T747 group: I-  
57 TCA group + 1 mg kg<sup>-1</sup> of obeticholic acid (one injection on day 5); 4) I-TGU group:  
58 I-TCA group + 25 mg kg<sup>-1</sup> of guggulsterone (one injection on day 5); 5) I-TSBI group:  
59 I-TCA group + 1 mg kg<sup>-1</sup> of SBI-115 (one injection on day 5); 6) I-T777 group: I-TCA  
60 group + 1 mg kg<sup>-1</sup> of INT-777 (one injection on day 5). The concentrations and periods

61 of each treatment were selected according to our pilot trials and other studies <sup>7</sup>.

## 62 **2.3.6 The concentrations of BAs in the content of hindgut**

### 63 *Preparation of standard and sample solutions*

64 37 standards were weighed accurately and the stock solutions were prepared using the  
65 solvent described in Table 1. Working solutions were prepared through serial dilution  
66 using methanol. The information and final concentration of each standard is shown in  
67 Table 1 and 2. The standard solutions were stored below -20 °C. About 10 mg of the  
68 hindgut content sample was collected and 300 µL methanol was added to precipitate  
69 protein, vortexed for 1min and then centrifuged at 4°C for 10 min (12, 000 g). The  
70 supernatant was concentrated and dried in a vacuum. The residue was dissolved with  
71 100 µL methanol and the supernatant was ready for the LC-MS analysis.

### 72 *LC/MS method*

73 The UPLC separation was performed on an Acquity UPLC system (Waters, U.K.)  
74 equipped with an Acquity UPLC® BEH C18 (1.7µm, 2.1x100mm, Waters) column.  
75 The temperature of the column was set at 40 °C. The sample injection volume was 5µL.  
76 Eluents consisted of 0.01% formic acid in water (eluent A) and ACN (eluent B). The  
77 flow rate was set at 0.25 mL/min. A 38-min elution gradient was performed as follows:  
78 0–4min, 25% B; 4–9min, 25–30% B; 9–14min, 30–36% B; 14–18min, 36–38% B; 18–  
79 24min, 38–50% B; 24–32min, 50–75% B; 32–35min, 75–100% B; 35–38min, 100–25%  
80 B. The MS analysis was performed using an AB 4000 mass spectrometer (AB, USA)  
81 equipped with an ESI source in the negative-ion mode working in the multiple reaction  
82 monitoring mode. An ion source voltage of 4.5 kV, a source temperature of 500 °C and  
83 a desolvation temperature of 380°C were used. Collision gas and the curtain gas were  
84 set at 6 psi and 30 psi, respectively, while the atomization gas and auxiliary gas were  
85 both at 50 psi. The parameters for each BA are shown in Table 3.

### 86 *Calibration curves, validation and samples analyses*

87 The calibration graphs were constructed by plotting the peak area versus concentration  
88 for each individual BA. The results are shown in Table 4. The intra- and inter-day  
89 precision was determined using a standard mixture of BAs (different final  
90 concentrations). The intra- and inter-day precision was 1.52%–10.14% and 2.18%–

23.44%, respectively. The stability of the method was evaluated by quality control (QC) in each batch. The relative standard deviations of all QCs were calculated based on the peak area. The results showed that the stability of each substance was less than 15%, which indicated that this method was stable and reliable, and could be applied to the detection of samples. Samples were analyzed and quantified using the method described above.

## References

1. C. Zou, N. Su, J. Wu, M. Xu, Z. Sun, Q. Liu, L. Chen, Y. Zhou, A. Wang and C. Ye, Dietary Radix Bupleuri extracts improves hepatic lipid accumulation and immune response of hybrid grouper (*Epinephelus lanceolatus* male symbol x *Epinephelus fuscoguttatus* female symbol), *Fish Shellfish Immunol*, 2019, **88**, 496-507.
2. P. Pathak, C. Xie, R. G. Nichols, J. M. Ferrell, S. Boehme, K. W. Krausz, A. D. Patterson, F. J. Gonzalez and J. Y. L. Chiang, Intestine farnesoid X receptor agonist and the gut microbiota activate G-protein bile acid receptor-1 signaling to improve metabolism, *Hepatology*, 2018, **68**, 1574-1588.
3. Y. Sheng, H. Ren, S. M. Limbu, Y. Sun, F. Qiao, W. Zhai, Z. Y. Du and M. Zhang, The Presence or Absence of Intestinal Microbiota Affects Lipid Deposition and Related Genes Expression in Zebrafish (*Danio rerio*), *Front Microbiol*, 2018, **9**, 1124.
4. E. L. Wang, Z. H. Yuan, K. Y. Wang, D. Y. Gao, Z. J. Liu and M. R. Liles, Consumption of florfenicol-medicated feed alters the composition of the channel catfish intestinal microbiota including enriching the relative abundance of opportunistic pathogens, *Aquaculture*, 2019, **501**, 111-118.
5. W. Jia, G. Xie and W. Jia, Bile acid-microbiota crosstalk in gastrointestinal inflammation and carcinogenesis, *Nat Rev Gastroenterol Hepatol*, 2018, **15**, 111-128.
6. F. Huang, X. Zheng, X. Ma, R. Jiang, W. Zhou, S. Zhou, Y. Zhang, S. Lei, S. Wang, J. Kuang, X. Han, M. Wei, Y. You, M. Li, Y. Li, D. Liang, J. Liu, T. Chen, C. Yan, R. Wei, C. Rajani, C. Shen, G. Xie, Z. Bian, H. Li, A. Zhao and W. Jia, Theabrownin from Pu-erh tea attenuates hypercholesterolemia via modulation of gut microbiota and bile acid metabolism, *Nat Commun*, 2019, **10**, 4971.
7. P. Xu, K. Xu, J. Wang, J. P. Jiang and L. Q. Chen, Pioglitazone: a promising therapeutic tool in sodium taurocholate-induced severe acute pancreatitis, *Dig Dis Sci*, 2011, **56**, 1082-1089.

**Table 1** The detailed information for bile acids

| Bile acid      | Full name                              | CAS        | Solvent  |
|----------------|----------------------------------------|------------|----------|
| alloLCA        | Allolithocholic acid                   | 2276-93-9  | methanol |
| LCA            | Lithocholic acid                       | 434-13-9   | methanol |
| isoLCA         | Isolithocholic acid                    | 1534-35-6  | methanol |
| NorDCA         | 23-Nordeoxycholic acid                 | 53608-86-9 | methanol |
| 12-ketoLCA     | 12-ketolithocholic acid                | 5130-29-0  | methanol |
| 7-ketoLCA      | 7-ketolithocholic acid                 | 4651-67-6  | methanol |
| $\beta$ -UDCA  | 3 $\beta$ -Ursodeoxycholic acid        | 78919-26-3 | methanol |
| DCA            | Deoxycholic acid                       | 83-44-3    | methanol |
| CDCA           | Chenodeoxycholic acid                  | 474-25-9   | methanol |
| UDCA           | Ursodeoxycholic acid                   | 128-13-2   | methanol |
| HDCA           | Hyodeoxycholic acid                    | 83-49-8    | methanol |
| NorCA          | Norcholic acid                         | 60692-62-0 | methanol |
| DHCA           | Dehydrocholic acid                     | 81-23-2    | methanol |
| 7,12-diketoLCA | 7,12-diketolithocholic acid            | 517-33-9   | methanol |
| $\alpha$ -MCA  | $\alpha$ -Muricholic acid              | 2393-58-0  | methanol |
| UCA            | Ursocholic acid                        | 2955-27-3  | methanol |
| $\beta$ -MCA   | $\beta$ -Muricholic acid               | 2393-59-1  | methanol |
| CA             | Cholic acid                            | 81-25-4    | methanol |
| ACA            | Allocholic acid                        | 2464-18-8  | methanol |
| $\beta$ CA     | 3 $\beta$ -Cholic acid                 | 3338-16-7  | methanol |
|                |                                        |            | 50%      |
| GLCA           | Glycolithocholic acid Sodium Salt      | 24404-83-9 | methanol |
| GHDCA          | Glycohyodeoxycholic acid               | 13042-33-6 | methanol |
| GCDCA          | Glycochenodeoxycholic acid Sodium Salt | 16564-43-5 | methanol |
| GUDCA          | Glycoursodeoxycholic acid              | 64480-66-6 | methanol |
| GDCA           | Glycodeoxycholic acid Sodium Salt      | 16409-34-0 | methanol |
|                |                                        |            | 50%      |
| LCA-3S         | Lithocholic acid 3-sulfate Sodium Salt | 34669-57-3 | methanol |
| GCA            | Sodium Glycocholate Hydrate            | 863-57-0   | methanol |
| TLCA           | Taurolithocholic acid Sodium Salt      | 6042-32-6  | methanol |
| THDCA          | Taurohyodeoxycholic acid Sodium Salt   | 38411-85-7 | methanol |
| TUDCA          | Tauroursodeoxycholic acid Sodium Salt  | 35807-85-3 | methanol |
| TDCA           | Taurodeoxycholic acid Sodium Salt      | 1180-95-6  | methanol |
| TCDCa          | Taurochenodeoxycholic acid             | 6009-98-9  | methanol |
| TCA            | Taurocholic acid Sodium Salt           | 145-42-6   | methanol |

|                  |                                                       |             |          |
|------------------|-------------------------------------------------------|-------------|----------|
| T- $\alpha$ -MCA | Tauro- $\alpha$ -muricholic acid Sodium Salt          | 25696-60-0  | methanol |
| T- $\beta$ -MCA  | Tauro- $\beta$ -muricholic acid Sodium Salt           | 145022-92-0 | methanol |
| CDCA-3G          | Chenodeoxycholic acid-3- $\beta$ -D-glucuronide       | 58814-71-4  | methanol |
| CDCA-24G         | Chenodeoxycholic acid 24-Acyl- $\beta$ -D-glucuronide | 208038-27-1 | methanol |

**Table 2** The final concentration of each standard solution (ng/mL)

| Name           | No. |     |    |    |    |    |     |     |     |      |      |      |      |
|----------------|-----|-----|----|----|----|----|-----|-----|-----|------|------|------|------|
|                | S1  | S2  | S3 | S4 | S5 | S6 | S7  | S8  | S9  | S10  | S11  | S12  | S13  |
| alloLCA        | /   | /   | /  | 2  | 4  | 10 | 20  | 40  | 100 | 200  | 400  | 1000 | 2000 |
| LCA            | /   | /   | 5  | 10 | 20 | 50 | 100 | 200 | 500 | 1000 | /    | /    | /    |
| isoLCA         | /   | /   | 5  | 10 | 20 | 50 | 100 | 200 | 500 | 1000 | 2000 | /    | /    |
| NorDCA         | /   | /   | 1  | 2  | 4  | 10 | 20  | 40  | 100 | 200  | 400  | /    | /    |
| 12-ketoLCA     | 1   | 2   | 5  | 10 | 20 | 50 | 100 | 200 | 500 | 1000 | 2000 | /    | /    |
| 7-ketoLCA      | /   | /   | 1  | 2  | 4  | 10 | 20  | 40  | 100 | 200  | 400  | 1000 | 2000 |
| $\beta$ -UDCA  | /   | /   | 5  | 10 | 20 | 50 | 100 | 200 | 500 | 1000 | 2000 | /    | /    |
| DCA            | /   | /   | 5  | 10 | 20 | 50 | 100 | 200 | 500 | 1000 | /    | /    | /    |
| CDCA           | /   | /   | 5  | 10 | 20 | 50 | 100 | 200 | 500 | 1000 | 2000 | /    | /    |
| UDCA           | /   | /   | 1  | 2  | 4  | 10 | 20  | 40  | 100 | 200  | 400  | /    | /    |
| HDCA           | /   | /   | 5  | 10 | 20 | 50 | 100 | 200 | 500 | 1000 | 2000 | /    | /    |
| NorCA          | /   | /   | /  | 2  | 4  | 10 | 20  | 40  | 100 | 200  | 400  | 1000 | 2000 |
| DHCA           | /   | /   | /  | /  | /  | 10 | 20  | 40  | 100 | 200  | 400  | 1000 | 2000 |
| 7,12-diketoLCA | /   | /   | /  | /  | 4  | 10 | 20  | 40  | 100 | 200  | 400  | 1000 | 2000 |
| 6,7-diketoLCA  | /   | /   | /  | /  | 4  | 10 | 20  | 40  | 100 | 200  | 400  | 1000 | 2000 |
| $\alpha$ -MCA  | /   | /   | 5  | 10 | 20 | 50 | 100 | 200 | 500 | 1000 | 2000 | /    | /    |
| UCA            | /   | /   | 1  | 2  | 4  | 10 | 20  | 40  | 100 | 200  | 400  | 1000 | 2000 |
| $\beta$ -MCA   | /   | /   | 5  | 10 | 20 | 50 | 100 | 200 | 500 | 1000 | 2000 | 5000 | /    |
| CA             | /   | /   | 5  | 10 | 20 | 50 | 100 | 200 | 500 | 1000 | 2000 | /    | /    |
| ACA            | /   | /   | 1  | 2  | 4  | 10 | 20  | 40  | 100 | 200  | 400  | 1000 | /    |
| $\beta$ -CA    | /   | /   | /  | 2  | 4  | 10 | 20  | 40  | 100 | 200  | 400  | 1000 | 2000 |
| GUCA           | /   | /   | /  | 2  | 4  | 10 | 20  | 40  | /   | /    | /    | /    | /    |
| GLCA           | /   | /   | 1  | 2  | 4  | 10 | 20  | 40  | 100 | 200  | 400  | 1000 | 2000 |
| GHDCA          | /   | 0.4 | 1  | 2  | 4  | 10 | 20  | 40  | 100 | 200  | 400  | 1000 | 2000 |
| GCDCA          | /   | /   | 5  | 10 | 20 | 50 | 100 | 200 | 500 | 1000 | 2000 | /    | /    |
| GUDCA          | /   | /   | 1  | 2  | 4  | 10 | 20  | 40  | 100 | 200  | 400  | 1000 | 2000 |
| GDCA           | /   | /   | 1  | 2  | 4  | 10 | 20  | 40  | 100 | 200  | 400  | 1000 | 2000 |
| LCA-3S         | /   | /   | 1  | 2  | 4  | 10 | 20  | 40  | 100 | 200  | 400  | 1000 | 2000 |

|                  |   |   |   |    |    |    |     |     |     |      |      |      |       |
|------------------|---|---|---|----|----|----|-----|-----|-----|------|------|------|-------|
| GCA              | / | / | 5 | 10 | 20 | 50 | 100 | 200 | 500 | 1000 | 2000 | 5000 | /     |
| TLCA             | / | / | 1 | 2  | 4  | 10 | 20  | 40  | 100 | 200  | 400  | 1000 | 2000  |
| TDCA             | / | / | 5 | 10 | 20 | 50 | 100 | 200 | 500 | 1000 | 2000 | 5000 | 10000 |
| TCDCA            | / | / | / | 10 | 20 | 50 | 100 | 200 | 500 | 1000 | 2000 | 5000 | 10000 |
| TCA              | / | / | 5 | 10 | 20 | 50 | 100 | 200 | 500 | 1000 | 2000 | 5000 | 10000 |
| T- $\alpha$ -MCA | / | / | 5 | 10 | 20 | 50 | 100 | 200 | 500 | 1000 | 2000 | 5000 | 10000 |
| THCA             | / | / | 1 | 2  | 4  | 10 | 20  | 40  | 100 | 200  | 400  | 1000 | 2000  |
| T- $\beta$ -MCA  | / | / | / | 10 | 20 | 50 | 100 | 200 | 500 | 1000 | 2000 | 5000 | 10000 |
| CDCA-G           | / | / | 2 | 4  | 8  | 20 | 40  | 80  | 200 | 400  | 800  | 2000 | 4000  |

**Table 3** The parameters of each bile acid

| Name           | Q1 (m/z) | Q3 (m/z) | DP (v) | EP (v) | CE (v) | CXP (v) |
|----------------|----------|----------|--------|--------|--------|---------|
| alloLCA        | 375.145  | 375.145  | -40    | -10    | -32    | -1      |
| LCA            | 375.3    | 375.3    | -150   | -10    | -18    | -9      |
| isoLCA         | 375.301  | 375.301  | -150   | -10    | -18    | -9      |
| NorDCA         | 377.3    | 377.3    | -145   | -10    | -18    | -9      |
| 12-ketoLCA     | 389.301  | 389.301  | -145   | -10    | -18    | -9      |
| 7-ketoLCA      | 389.302  | 389.302  | -150   | -10    | -18    | -9      |
| $\beta$ -UDCA  | 391.254  | 391.254  | -150   | -10    | -26    | -9      |
| DCA            | 391.3    | 391.3    | -145   | -10    | -18    | -9      |
| CDCA           | 391.301  | 391.301  | -145   | -10    | -18    | -9      |
| UDCA           | 391.302  | 391.302  | -150   | -10    | -18    | -9      |
| HDCA           | 391.303  | 391.303  | -150   | -10    | -18    | -9      |
| NorCA          | 393.211  | 329.1    | -130   | -10    | -46    | -3      |
| DHCA           | 401.2    | 401.2    | -138   | -10    | -18    | -9      |
| 7,12-diketoLCA | 403.14   | 403.14   | -125   | -10    | -38    | -10     |
| 6,7-diketoLCA  | 403.3    | 403.3    | -140   | -10    | -18    | -9      |
| $\alpha$ -MCA  | 407.3    | 407.3    | -166   | -10    | -18    | -9      |
| UCA            | 407.301  | 407.301  | -140   | -10    | -18    | -9      |
| $\beta$ -MCA   | 407.302  | 407.302  | -155   | -10    | -18    | -5      |
| CA             | 407.303  | 407.303  | -140   | -10    | -18    | -5      |
| ACA            | 407.304  | 407.304  | -140   | -10    | -18    | -9      |
| $\beta$ -CA    | 407.362  | 407.362  | -155   | -10    | -44    | -9      |
| GUCA           | 416.2    | 73.9     | -120   | -10    | -58    | -3      |
| GLCA           | 432.401  | 73.9     | -90    | -10    | -62    | -5      |

|                  |         |       |      |     |      |     |
|------------------|---------|-------|------|-----|------|-----|
| GHDCA            | 448.2   | 74    | -105 | -10 | -44  | -13 |
| GCDCA            | 448.276 | 73.9  | -135 | -10 | -68  | -5  |
| GUDCA            | 448.277 | 73.9  | -130 | -10 | -58  | -5  |
| GDCA             | 448.279 | 73.9  | -90  | -10 | -68  | -5  |
| LCA-3S           | 455.196 | 96.9  | -140 | -10 | -72  | -1  |
| GCA              | 464.281 | 73.9  | -115 | -10 | -64  | -5  |
| TLCA             | 482.223 | 80    | -115 | -10 | -100 | -1  |
| TDCA             | 498.35  | 79.8  | -175 | -10 | -102 | -5  |
| TCDCa            | 498.357 | 79.8  | -40  | -10 | -100 | -5  |
| TCA              | 514.332 | 79.8  | -155 | -10 | -102 | -7  |
| T- $\alpha$ -MCA | 514.337 | 79.9  | -145 | -10 | -100 | -5  |
| THCA             | 514.343 | 79.9  | -185 | -10 | -98  | -7  |
| T- $\beta$ -MCA  | 514.346 | 79.9  | -125 | -10 | -100 | -5  |
| CDCA-G           | 567.525 | 391.1 | -100 | -10 | -48  | -5  |

Q1: precursor ion; Q3: fragment ion; DP: distribution potential; EP: entrance potential;  
CE: collision energy; CXP: collision cell exit potential.

**Table 4** Calibration curves and LOQ of each bile acid

| Name           | RT<br>(min) | Linear equation | Correlation<br>coefficient<br>(r) | Linear Range<br>(ng/mL) | LOQ<br>(ng/mL) |
|----------------|-------------|-----------------|-----------------------------------|-------------------------|----------------|
| alloLCA        | 30.08       | Y=1530X+68      | 0.9984                            | 2-2000                  | 2              |
| LCA            | 32.09       | Y=11700X+7670   | 0.9972                            | 5-1000                  | 5              |
| isoLCA         | 30.49       | Y=6320X+3940    | 0.9968                            | 5-2000                  | 5              |
| NorDCA         | 24.59       | Y=12900X+5790   | 0.9963                            | 1-400                   | 1              |
| 12-ketoLCA     | 24.68       | Y=5280X+4140    | 0.9968                            | 1-2000                  | 1              |
| 7-ketoLCA      | 24.08       | Y=6740X+2070    | 0.9947                            | 1-2000                  | 1              |
| $\beta$ -UDCA  | 20.02       | Y=6650X+5560    | 0.9973                            | 5-2000                  | 5              |
| DCA            | 27.49       | Y=12300X+12000  | 0.9973                            | 5-1000                  | 5              |
| CDCA           | 26.89       | Y=9950X+17400   | 0.9931                            | 5-2000                  | 5              |
| UDCA           | 21.72       | Y=15500X+7490   | 0.9962                            | 1-400                   | 1              |
| HDCA           | 22.12       | Y=6950X+9130    | 0.9968                            | 5-2000                  | 5              |
| NorCA          | 16.21       | Y=350X+198      | 0.9986                            | 2-2000                  | 2              |
| DHCA           | 14.07       | Y=4920X+3220    | 0.9985                            | 10-2000                 | 10             |
| 7,12-diketoLCA | 13.44       | Y=1260X+232     | 0.998                             | 4-2000                  | 4              |
| 6,7-diketoLCA  | 24.24       | Y=3350X+886     | 0.996                             | 4-2000                  | 4              |



|                  |       |                |        |          |     |
|------------------|-------|----------------|--------|----------|-----|
| $\alpha$ -MCA    | 15.93 | Y=5560X+3750   | 0.9972 | 5-2000   | 5   |
| UCA              | 12.88 | Y=9920X+1630   | 0.9985 | 1-2000   | 1   |
| $\beta$ -MCA     | 16.75 | Y=4810X+7710   | 0.9962 | 5-5000   | 5   |
| CA               | 21.11 | Y=13700X+26400 | 0.9966 | 5-2000   | 5   |
| ACA              | 20.64 | Y=9490X+105    | 0.9985 | 1-1000   | 1   |
| $\beta$ -CA      | 15.39 | Y=1470X+1030   | 0.9968 | 2-2000   | 2   |
| GUCA             | 36.72 | Y=681X+23.8    | 0.9984 | 2-40     | 2   |
| GLCA             | 27.98 | Y=3180X+267    | 0.9983 | 1-2000   | 1   |
| GHDCA            | 15.53 | Y=1040X+13.2   | 0.9965 | 0.4-2000 | 0.4 |
| GCDCA            | 21.88 | Y=2180X+1500   | 0.9974 | 5-2000   | 5   |
| GUDCA            | 15.23 | Y=2450X+1890   | 0.996  | 1-2000   | 1   |
| GDCA             | 22.87 | Y=2430X+101    | 0.9987 | 1-2000   | 1   |
| LCA-3S           | 26.44 | Y=5700X+59     | 0.9991 | 1-2000   | 1   |
| GCA              | 15.51 | Y=1730X+1430   | 0.9974 | 5-5000   | 5   |
| TLCA             | 24.41 | Y=2220X+3630   | 0.9982 | 1-2000   | 1   |
| TDCA             | 18.87 | Y=2520X+1800   | 0.9975 | 5-10000  | 5   |
| TCDCA            | 17.53 | Y=1280X-550    | 0.999  | 10-10000 | 10  |
| TCA              | 12.86 | Y=1750X+951    | 0.9987 | 5-10000  | 5   |
| T- $\alpha$ -MCA | 7.45  | Y=564X+368     | 0.9991 | 5-10000  | 5   |
| THCA             | 10.27 | Y=1900X-57.8   | 0.9992 | 10-10000 | 10  |
| T- $\beta$ -MCA  | 7.77  | Y=707X+184     | 0.9989 | 10-10000 | 10  |
| CDCA-G           | 20.62 | Y=569X+350     | 0.999  | 2-4000   | 2   |

LOQ is determined by the signal-to-noise ratio (S/N), which is calculated by comparing the signals of known samples with blank samples. Generally, the corresponding concentration is defined as LOQ when the S/N is 10:1 (S/N=10).
